# Supplementary material
Source: publisher figshare collection journal article supplement (https://acs.figshare.com/ndownloader/files/4099297)
Supplement: Supplementary file 1 [file 4099297]

## SUPPORTING INFORMATION

### **Experimental study of crossover from capillary to viscous fingering for supercritical CO<sub>2</sub> - water displacement in a homogeneous pore network**

Ying Wang<sup>1</sup>, Changyong Zhang<sup>2\*</sup>, Ning Wei<sup>1</sup>, Mart Oostrom<sup>2</sup>, Thomas W. Wietsma<sup>2</sup>, Xiaochun  
Li<sup>1</sup>, Alain Bonneville<sup>2</sup>

<sup>1</sup>State Key Laboratory for Geomechanics and Geotechnical Engineering, Institute of Rock and  
Soil Mechanics, Chinese Academy of Sciences, Wuhan 430071, China

<sup>2</sup>Pacific Northwest National Laboratory, 902 Battelle Boulevard, P. O. Box 999, MSIN K8-96,  
Richland, Washington 99352, United States

\*Corresponding author e-mail: Changyong.Zhang@pnnl.gov; phone: 1-509-371-6659; fax: 1-  
509-371-6354.

Journal: Environmental Science & Technology

Number of Pages: 7

Number of Figures: 5

Number of Tables: 1

Date prepared: June 4, 2012

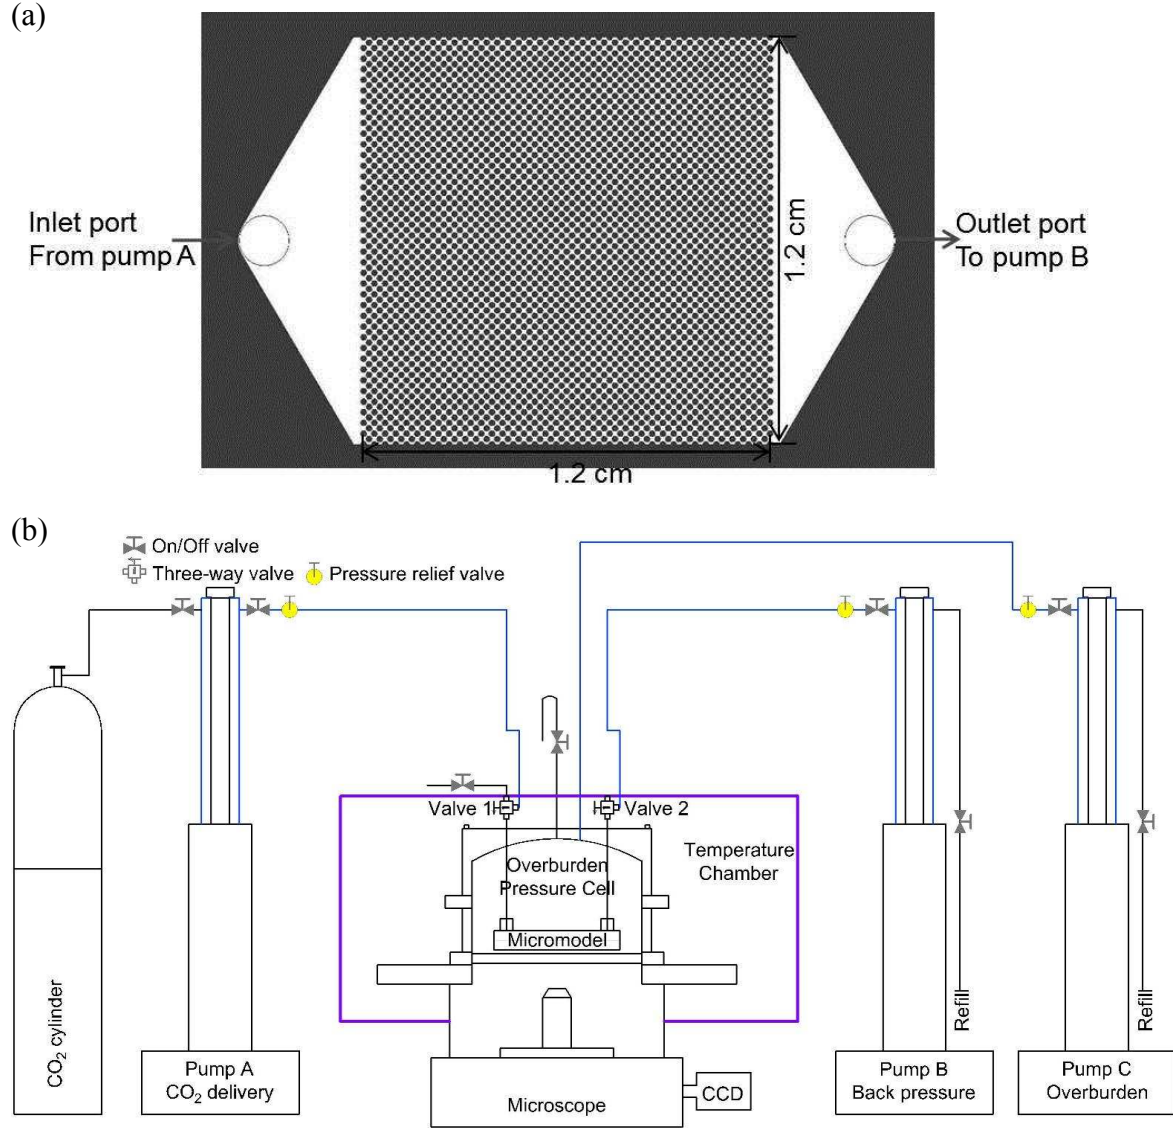

**Figure S1.** Schematic of (a) the micromodel and (b) the scCO<sub>2</sub> - water displacement experiment system. The blue lines indicate heating by circulating hot water. The purple line indicates heating by circulating hot air.

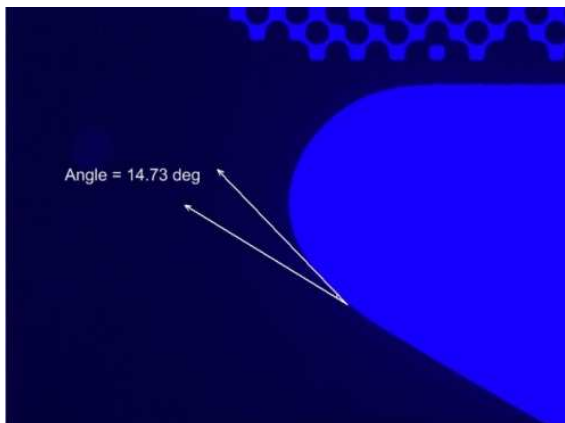

**Figure S2.** Water - scCO<sub>2</sub> contact angle with the micromodel surface measured in the micromodel outlet channel.

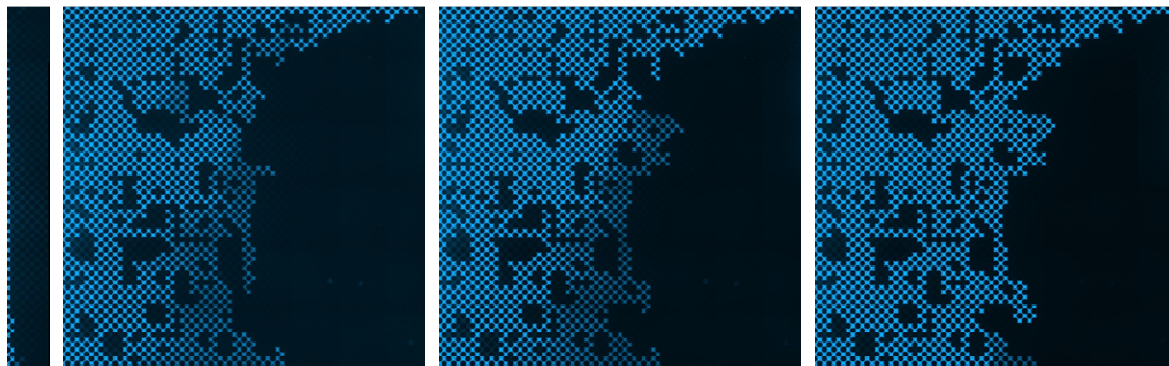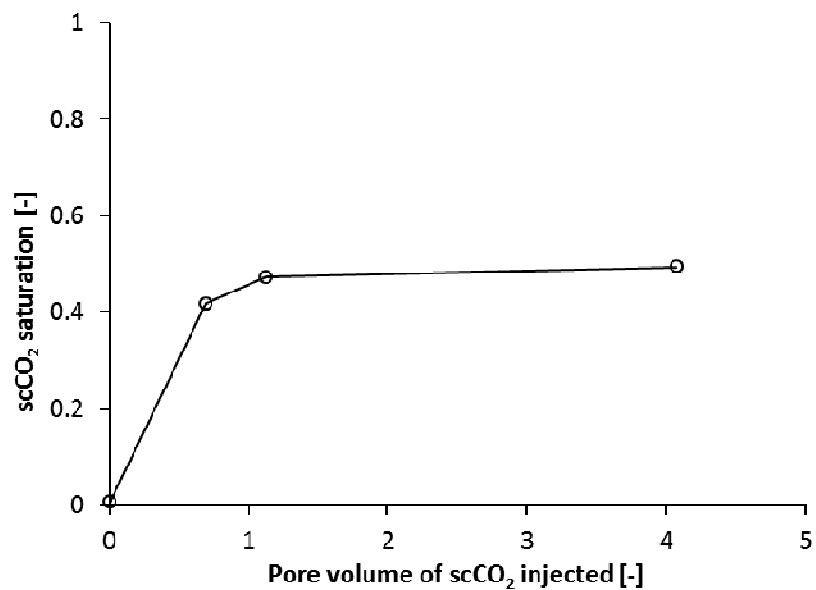

**Figure S3.** ScCO<sub>2</sub> saturation vs. injected scCO<sub>2</sub> pore volume into the micromodel at  $\log Ca = -7.61$ .

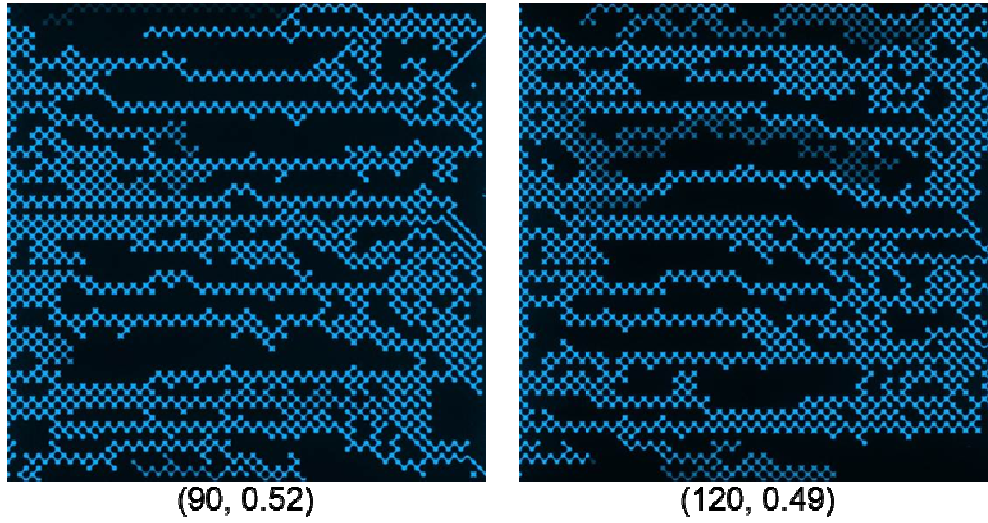

**Figure S4.** ScCO<sub>2</sub> (blue) distribution in micromodel from two replicate experiments at  $\log Ca = -4.91$ . The numbers in paranthesis indicate injected scCO<sub>2</sub> pore volumes and average scCO<sub>2</sub> saturation, respectively.

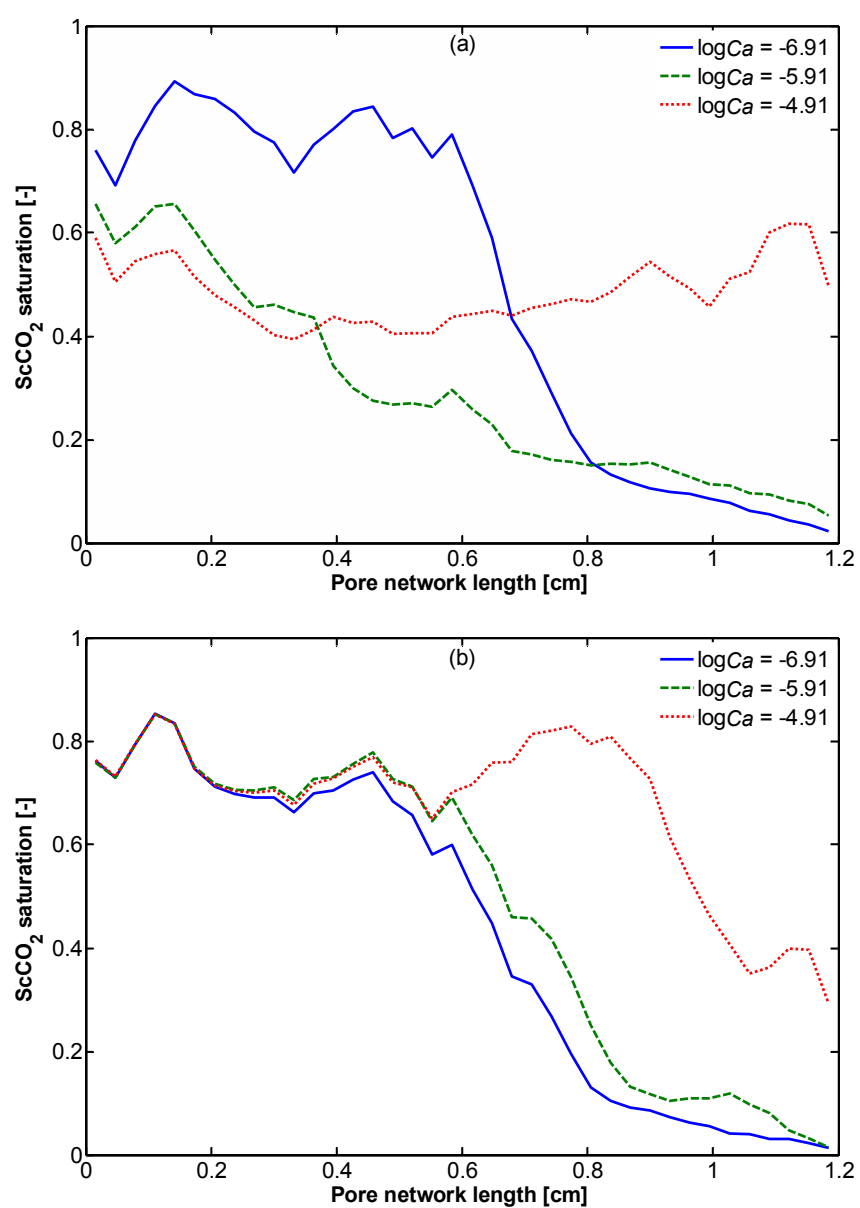

**Figure S5.** Transverse average  $\text{scCO}_2$  saturations along the length of the micromodel pore network: (a) discontinuous-rate experiments, (b) continuous-rate experiments.

- 1 **Table S1.** ScCO<sub>2</sub> flowrates at various distances from an injection well with an annual injection
- 2 rate of 1 Mt/yr over a screen length of 15 m.

| Parameter                                    | Value | Distance<br>(m) | Darcy velocity<br><sup>a</sup> (m/d) |
|----------------------------------------------|-------|-----------------|--------------------------------------|
| Well radius (m)                              | 0.15  | 0.1             | 237.3                                |
| Aquifer thickness (m)                        | 15    | 1               | 51.6                                 |
| Porosity (-)                                 | 0.15  | 10              | 5.8                                  |
| CO <sub>2</sub> density (kg/m <sup>3</sup> ) | 490   | 100             | 0.6                                  |
| Injection rate (m <sup>3</sup> /d)           | 5591  | 1000            | 0.06                                 |

- 3 <sup>a</sup>: Gravity override is neglected in the calculation.
